# Supplementary material for: The Information Asymmetry Effects of Expanded Disclosures About Derivative and Hedging Activities
Source: Atypon-hosted journal article supplement (doi:10.1287/mnsc.2021.4198), 2021-12-21
Supplement: mnsc.2021.4198.sm2.zip [file Readme.pdf › Data Files/Readme.pdf]

**Readme file for data and code submitted to *Management Science* for:  
“The Information Asymmetry Effects of Expanded Disclosures about  
Derivative and Hedging Activities”**  
Thomas D. Steffen, Yale University

The following table lists the various tabulated and untabulated analyses from the main paper and the internet appendix, along with the corresponding code and datasets that were submitted to *Management Science* in conjunction with the final manuscript.

| <b><i>Tabulated results from the main paper</i></b>                             |                                     |                         |
|---------------------------------------------------------------------------------|-------------------------------------|-------------------------|
| <b>Analysis</b>                                                                 | <b>Dataset(s)</b>                   | <b>Code</b>             |
| Table 1, Panel A*                                                               | N/A                                 | N/A                     |
| Table 1, Panel B                                                                | tds_data1.dta                       | tds_code_main.do        |
| Table 2                                                                         | tds_data1.dta                       | tds_code_main.do        |
| Table 3, Panel A                                                                | tds_data1.dta                       | tds_code_main.do        |
| Table 3, Panel B                                                                | tds_data1.dta                       | tds_code_main.do        |
| Table 4                                                                         | tds_data1.dta                       | tds_code_main.do        |
| Table 5, Panel A                                                                | tds_data1.dta                       | tds_code_main.do        |
| Table 5, Panel B                                                                | tds_data1.dta                       | tds_code_main.do        |
| Table 5, Panel C                                                                | tds_data1.dta                       | tds_code_main.do        |
| Table 6, Panel A                                                                | tds_data2.dta                       | tds_code_main.do        |
| Table 6, Panel B                                                                | tds_data1.dta,<br>tds_data_boot.dta | tds_code_boot.do        |
| Table 7                                                                         | tds_data1.dta                       | tds_code_main.do        |
| Table 8, Panel A                                                                | tds_data1.dta                       | tds_code_main.do        |
| Table 8, Panel B                                                                | tds_data1.dta                       | tds_code_main.do        |
| Table 9                                                                         | tds_data1.dta                       | tds_code_main.do        |
| <b><i>Untabulated results from the main paper</i></b>                           |                                     |                         |
| <b>Analysis</b>                                                                 | <b>Dataset(s)</b>                   | <b>Code</b>             |
| Factor analysis (footnote #21)                                                  | tds_data1.dta                       | tds_code_main.do        |
| Pearson's $\chi^2$ (Section 3.2)                                                | tds_data1.dta                       | tds_code_main.do        |
| Coarsened exact matching and entropy balancing (Section 4.3.1 and footnote #30) | tds_data1.dta                       | tds_code_main.do        |
| Alternative specifications from Table 8 Panel B (footnote #34)                  | tds_data1.dta                       | tds_code_main.do        |
| Wald tests in Table 9 (Section 5)                                               | tds_data1.dta                       | tds_code_main.do        |
| <b><i>Tabulated results from the internet appendix</i></b>                      |                                     |                         |
| <b>Analysis</b>                                                                 | <b>Dataset(s)</b>                   | <b>Code</b>             |
| Figure IA.2, Panel A                                                            | tds_data4.dta                       | tds_code_intappendix.do |
| Figure IA.2, Panel B                                                            | tds_data4.dta                       | tds_code_intappendix.do |
| Figure IA.2, Panel C                                                            | tds_data4.dta                       | tds_code_intappendix.do |
| Figure IA.2, Panel D                                                            | tds_data4.dta                       | tds_code_intappendix.do |
| Table IA.2, Panel A                                                             | tds_data1.dta                       | tds_code_intappendix.do |
| Table IA.2, Panel B                                                             | tds_data1.dta                       | tds_code_intappendix.do |
| Table IA.3                                                                      | tds_data3.dta                       | tds_code_intappendix.do |
| Table IA.4                                                                      | tds_data3.dta                       | tds_code_intappendix.do |
| Table IA.5                                                                      | tds_data5.dta                       | N/A <sup>+</sup>        |

**Untabulated results from the internet appendix**

| Analysis                                                                                                              | Dataset(s)    | Code                    |
|-----------------------------------------------------------------------------------------------------------------------|---------------|-------------------------|
| Main results from Table 4 with <i>DHCI</i> as additional control (p. 2)                                               | tds_data1.dta | tds_code_intappendix.do |
| Real effects results with $POST \times \Delta DHCI$ as additional control in <i>DHDISC</i> models from Table 8 (p. 2) | tds_data1.dta | tds_code_intappendix.do |

\* The sample selection procedures and number of firms lost with the various criteria shown in Panel A of Table 1 were recorded manually by reviewing log files during the data assembly described below.

+ There is no code file associated with Table IA.5 because the dataset (tds\_data5.dta) contains the counts for each dictionary item as a separate column. The dataset itself was simply exported to Excel and sorted in descending order to create Table IA.5.

For each of the Stata .do files mentioned in the table above, I have submitted a Stata log file (.smcl) to confirm that the .do files run correctly and produce the desired output. For details on the assembly of the final datasets mentioned in the above table, see the submitted file titled “tds\_data\_flowchart.pdf”, which presents a flowchart showing the links among the many intermediate programs and datasets that were used. The intermediate programs referenced in this flowchart are also included as part of the data submission to *Management Science*. If any researcher has questions about the programs or processes described in this document, please contact me at [thomas.steffen@yale.edu](mailto:thomas.steffen@yale.edu).

The following tables provide descriptions of the variables in each of the datasets referenced above. Many of the descriptions will reference Appendix B of the main paper where detailed definitions are already provided.

| <b>Variables in tds_data1.dta, the main firm-quarter panel dataset used for most results in the paper:</b> |                                                                                                                                                                                                                                                                                                                                                           |
|------------------------------------------------------------------------------------------------------------|-----------------------------------------------------------------------------------------------------------------------------------------------------------------------------------------------------------------------------------------------------------------------------------------------------------------------------------------------------------|
| Variable                                                                                                   | Description                                                                                                                                                                                                                                                                                                                                               |
| ABSdRISKEXP                                                                                                | See references to $ \Delta RISKEXP $ in the definition of $\Delta RISKEXP$ in Appendix B                                                                                                                                                                                                                                                                  |
| BTM                                                                                                        | See Appendix B for <i>BTM</i>                                                                                                                                                                                                                                                                                                                             |
| d10KSIZE                                                                                                   | See Appendix B for $\Delta 10KSIZE$                                                                                                                                                                                                                                                                                                                       |
| datadate                                                                                                   | Compustat <i>DATADATE</i> for each firm-quarter                                                                                                                                                                                                                                                                                                           |
| dCASH                                                                                                      | See Appendix B for $\Delta CASH$                                                                                                                                                                                                                                                                                                                          |
| dCRATING                                                                                                   | See Appendix B for $\Delta CRATING$                                                                                                                                                                                                                                                                                                                       |
| dCRISIS                                                                                                    | See Appendix B for $\Delta CRISIS$                                                                                                                                                                                                                                                                                                                        |
| dGROUP                                                                                                     | See Appendix B for $\Delta GROUP$                                                                                                                                                                                                                                                                                                                         |
| dGROUPscale                                                                                                | dGROUP, scaled by its sample standard deviation obtained from observations with DHFIRM = 1                                                                                                                                                                                                                                                                |
| DHACTIVITY                                                                                                 | See Appendix B for <i>DHACTIVITY</i>                                                                                                                                                                                                                                                                                                                      |
| DHACTIVITYscale                                                                                            | DHACTIVITY, scaled by its sample standard deviation obtained from observations with DHFIRM = 1                                                                                                                                                                                                                                                            |
| DHACTquint                                                                                                 | Quintile ranking of DHACTIVITY used for parallel trends plots in Table 5. Because DHACTIVITY = 0 for 63% of the sample, I group these observations together in the lowest quintile, and the remaining observations with non-zero DHACTIVITY are divided into two groups with each having roughly the same number of observations as each DHDISC quintile. |
| DHCI                                                                                                       | $100 \times  CIDERGLQ/ATQ $ using Compustat data. Also see the definition of <i>DHACTIVITY</i> in Appendix B.                                                                                                                                                                                                                                             |
| DHDISC                                                                                                     | See Appendix B for <i>DHDISC</i>                                                                                                                                                                                                                                                                                                                          |
| DHDISCquint                                                                                                | Quintile ranking of DHDISC used for parallel trends plots in Table 5                                                                                                                                                                                                                                                                                      |

|                  |                                                                                                                                                                                                 |
|------------------|-------------------------------------------------------------------------------------------------------------------------------------------------------------------------------------------------|
| DHDISCscale      | DHDISC, scaled by its sample standard deviation from obtained from observations with DHFIRM = 1                                                                                                 |
| DHFIRM           | See Appendix B for <i>DHFIRM</i>                                                                                                                                                                |
| DHFIRM_DHACT     | An alternative version of DHFIRM used in the coarsened exact matching and entropy balancing analyses. It is an indicator equal to one if DHACTIVITY > 0.                                        |
| DHFIRM_DHDISC    | An alternative version of DHFIRM used in the coarsened exact matching and entropy balancing analyses. It is an indicator equal to one if DHDISC is greater than the median value of -0.2821576. |
| dLINECREDIT      | See Appendix B for <i>dLINECREDIT</i>                                                                                                                                                           |
| dNOTESPAY        | See Appendix B for <i>dNOTESPAY</i>                                                                                                                                                             |
| dNUMS            | See Appendix B for <i>dNUMS</i>                                                                                                                                                                 |
| dNUMSscale       | dNUMS, scaled by its sample standard deviation obtained from observations with DHFIRM = 1                                                                                                       |
| DRISK            | See Appendix B for <i>DRISK</i>                                                                                                                                                                 |
| dRISKEXP         | See Appendix B for <i>dRISKEXP</i>                                                                                                                                                              |
| dTABNUMS         | See Appendix B for <i>dTABNUMS</i>                                                                                                                                                              |
| dTABNUMSscale    | dTABNUMS, scaled by its sample standard deviation obtained from observations with DHFIRM = 1                                                                                                    |
| dWORDS           | See Appendix B for <i>dWORDS</i>                                                                                                                                                                |
| dWORDSscale      | dWORDS, scaled by its sample standard deviation obtained from observations with DHFIRM = 1                                                                                                      |
| fdate            | Filing date of the 10-Q or 10-K corresponding to each firm-quarter in the dataset, obtained from the WRDS SEC Analytics Suite.                                                                  |
| ff12             | Fama/French 12 industry                                                                                                                                                                         |
| firmobsnum       | A count variable for each sample firm used to verify that each sample firm has 8 observations and to restrict certain analyses to one observation per firm.                                     |
| FOLLOW           | See Appendix B for <i>FOLLOW</i>                                                                                                                                                                |
| gvkey            | Compustat GVKEY                                                                                                                                                                                 |
| LEV              | See Appendix B for <i>LEV</i>                                                                                                                                                                   |
| NONDHFIRM        | An indicator equal to one if DHFIRM = 0                                                                                                                                                         |
| PASTSTDRET       | See Appendix B for <i>PASTSTDRET</i>                                                                                                                                                            |
| POST             | See Appendix B for <i>POST</i>                                                                                                                                                                  |
| POSTxd10KSIZE    | Interaction of POST and d10KSIZE                                                                                                                                                                |
| POSTxdCASH       | Interaction of POST and dCASH                                                                                                                                                                   |
| POSTxdCRATING    | Interaction of POST and dCRATING                                                                                                                                                                |
| POSTxdCRISIS     | Interaction of POST and dCRISIS                                                                                                                                                                 |
| POSTxdDHCI       | Interaction of POST and dDHCI                                                                                                                                                                   |
| POSTxdGROUP      | Interaction of POST and dGROUPscale                                                                                                                                                             |
| POSTxdDHACTIVITY | Interaction of POST and DHACTIVITYscale                                                                                                                                                         |
| POSTxdHDDISC     | Interaction of POST and DHDISCscale                                                                                                                                                             |
| POSTxdLINECREDIT | Interaction of POST and dLINECREDIT                                                                                                                                                             |
| POSTxdNOTESPAY   | Interaction of POST and dNOTESPAY                                                                                                                                                               |
| POSTxdNUMS       | Interaction of POST and dNUMSscale                                                                                                                                                              |
| POSTxdRISKEXP    | Interaction of POST and dRISKEXP                                                                                                                                                                |
| POSTxdTABNUMS    | Interaction of POST and dTABNUMSscale                                                                                                                                                           |
| POSTxdWORDS      | Interaction of POST and dWORDSscale                                                                                                                                                             |
| PRE1             | An indicator equal to one for observations coming one quarter prior to SFAS 161 adoption                                                                                                        |
| PRE1xDHACTIVITY  | Interaction of PRE1 and DHACTIVITYscale                                                                                                                                                         |
| PRE1xDHDDISC     | Interaction of PRE1 and DHDISCscale                                                                                                                                                             |
| PRE2             | An indicator equal to one for observations coming two quarters prior to SFAS 161 adoption                                                                                                       |
| PRE2xDHACTIVITY  | Interaction of PRE2 and DHACTIVITYscale                                                                                                                                                         |
| PRE2xDHDDISC     | Interaction of PRE2 and DHDISCscale                                                                                                                                                             |

|                    |                                                                                                                                                                       |
|--------------------|-----------------------------------------------------------------------------------------------------------------------------------------------------------------------|
| premean_BT         | Firm-specific average of BTM based on each firm's four observations with POST = 0                                                                                     |
| premean_DRISK      | Firm-specific average of DRISK based on each firm's four observations with POST = 0                                                                                   |
| premean_FOLLOW     | Firm-specific average of FOLLOW based on each firm's four observations with POST = 0                                                                                  |
| premean_LEV        | Firm-specific average of LEV based on each firm's four observations with POST = 0                                                                                     |
| premean_PASTSTDRET | Firm-specific average of PASTSTDRET based on each firm's four observations with POST = 0                                                                              |
| premean_PRICE      | Firm-specific average of PRICE based on each firm's four observations with POST = 0                                                                                   |
| premean_ROA        | Firm-specific average of ROA based on each firm's four observations with POST = 0                                                                                     |
| premean_SIZE       | Firm-specific average of SIZE based on each firm's four observations with POST = 0                                                                                    |
| premean_SPREAD     | Firm-specific average of SPREAD based on each firm's four observations with POST = 0                                                                                  |
| premean_TRADESIZE  | Firm-specific average of TRADESIZE based on each firm's four observations with POST = 0                                                                               |
| premean_TURNOVER   | Firm-specific average of TURNOVER based on each firm's four observations with POST = 0                                                                                |
| PRICE              | See Appendix B for <i>PRICE</i>                                                                                                                                       |
| qtrdiff            | Quarter relative to adoption of SFAS 161. For example, qtrdiff = 0 (-1) for the quarter of adoption (quarter before adoption).                                        |
| RISKEXPpost        | See references to <i>RISKEXP<sub>POST</sub></i> in the definition of $\Delta RISKEXP$ in Appendix B                                                                   |
| RISKEXPpre         | See references to <i>RISKEXP<sub>PRE</sub></i> in the definition of $\Delta RISKEXP$ in Appendix B                                                                    |
| ROA                | See Appendix B for <i>ROA</i>                                                                                                                                         |
| SIZE               | See Appendix B for <i>SIZE</i>                                                                                                                                        |
| SPREAD             | See Appendix B for <i>SPREAD</i>                                                                                                                                      |
| SPREAD_q5_dhact    | Mean value of SPREAD across all observations corresponding to each combination of DHACT <sub>quint</sub> and qtrdiff.                                                 |
| SPREAD_q5_dhdisc   | Mean value of SPREAD across all observations corresponding to each combination of DHDISC <sub>quint</sub> and qtrdiff.                                                |
| TIME               | Variable used for time fixed effects, generated as the year-quarter corresponding to the fdate variable. For example, if fdate = "May 12, 2008", then TIME = "20082". |
| TRADESIZE          | See Appendix B for <i>TRADESIZE</i>                                                                                                                                   |
| TURNOVER           | See Appendix B for <i>TURNOVER</i>                                                                                                                                    |
| VIX                | See Appendix B for <i>VIX</i>                                                                                                                                         |
|                    |                                                                                                                                                                       |

**Variables in tds\_data2.dta, the alternative firm-quarter panel dataset based on a pseudo adoption date of SFAS 161 for the analyses in Table 6 Panel A:**

| Variable        | Description               |
|-----------------|---------------------------|
| BTM             | Same as for tds_data1.dta |
| datadate        | Same as for tds_data1.dta |
| DHFIRM          | Same as for tds_data1.dta |
| DRISK           | Same as for tds_data1.dta |
| FOLLOW          | Same as for tds_data1.dta |
| gvkey           | Same as for tds_data1.dta |
| LEV             | Same as for tds_data1.dta |
| PASTSTDRET      | Same as for tds_data1.dta |
| POST            | Same as for tds_data1.dta |
| POSTxDHACTIVITY | Same as for tds_data1.dta |
| POSTxDHDISC     | Same as for tds_data1.dta |
| PRICE           | Same as for tds_data1.dta |
| ROA             | Same as for tds_data1.dta |
| SIZE            | Same as for tds_data1.dta |
| SPREAD          | Same as for tds_data1.dta |

|                                                                                                                                                                      |                                                                                                                                                                                                                                                                          |
|----------------------------------------------------------------------------------------------------------------------------------------------------------------------|--------------------------------------------------------------------------------------------------------------------------------------------------------------------------------------------------------------------------------------------------------------------------|
| TIME                                                                                                                                                                 | Same as for tds_data1.dta                                                                                                                                                                                                                                                |
| TRADESIZE                                                                                                                                                            | Same as for tds_data1.dta                                                                                                                                                                                                                                                |
| TURNOVER                                                                                                                                                             | Same as for tds_data1.dta                                                                                                                                                                                                                                                |
| VIX                                                                                                                                                                  | Same as for tds_data1.dta                                                                                                                                                                                                                                                |
| <b>Variables in tds_data_boot.dta, the dataset used for the bootstrap analysis in Table 6 Panel B where each observation represents one repetition of the model:</b> |                                                                                                                                                                                                                                                                          |
| <b>Variable</b>                                                                                                                                                      | <b>Description</b>                                                                                                                                                                                                                                                       |
| DHACT_FULL                                                                                                                                                           | The $POST \times DHACTIVITY$ coefficient estimate stored for the full sample model.                                                                                                                                                                                      |
| DHACT_SUB                                                                                                                                                            | The $POST \times DHACTIVITY$ coefficient estimate stored for the <i>DHFIRM</i> subsample model.                                                                                                                                                                          |
| DHDISC_FULL                                                                                                                                                          | The $POST \times DHDISC$ coefficient estimate stored for the full sample model.                                                                                                                                                                                          |
| DHDISC_SUB                                                                                                                                                           | The $POST \times DHDISC$ coefficient estimate stored for the <i>DHFIRM</i> subsample model.                                                                                                                                                                              |
| loopnum                                                                                                                                                              | The count of the bootstrap repetitions (ranges from 1 to 10,000)                                                                                                                                                                                                         |
| samemean                                                                                                                                                             | The sample average over each repetition's data panel for which the value of <i>POST</i> in the true dataset (tds_data1.dta) matches the value of the pseudo values of <i>POST</i> used for the bootstrap repetitions. By construction, samemean should hover around 75%. |
| <b>Variables in tds_data3.dta, the firm-month panel dataset used for the <i>SPREADRISK</i> models in the internet appendix Tables IA.3 and IA.4:</b>                 |                                                                                                                                                                                                                                                                          |
| <b>Variable</b>                                                                                                                                                      | <b>Description</b>                                                                                                                                                                                                                                                       |
| BTM                                                                                                                                                                  | Same as for tds_data1.dta except that BTM corresponds to the most recent fiscal quarter before the calendar month corresponding to each observation.                                                                                                                     |
| datadate                                                                                                                                                             | Compustat datadate for the most recent fiscal quarter before the start of the calendar month corresponding to each observation.                                                                                                                                          |
| DHFIRM                                                                                                                                                               | Same as for tds_data1.dta                                                                                                                                                                                                                                                |
| FOLLOW                                                                                                                                                               | Same as for tds_data1.dta except that FOLLOW corresponds to the most recent fiscal quarter before the calendar month corresponding to each observation.                                                                                                                  |
| gvkey                                                                                                                                                                | Same as for tds_data1.dta                                                                                                                                                                                                                                                |
| LEV                                                                                                                                                                  | Same as for tds_data1.dta except that LEV corresponds to the most recent fiscal quarter before the calendar month corresponding to each observation.                                                                                                                     |
| MPRICE                                                                                                                                                               | Same as for tds_data1.dta except that MPRICE is calculated over the same calendar month corresponding to each observation.                                                                                                                                               |
| MTRADESIZE                                                                                                                                                           | Same as for tds_data1.dta except that MTRADESIZE is calculated over the same calendar month corresponding to each observation.                                                                                                                                           |
| MTURNOVER                                                                                                                                                            | Same as for tds_data1.dta except that MTURNOVER is calculated over the same calendar month corresponding to each observation.                                                                                                                                            |
| MVIX                                                                                                                                                                 | Same as for tds_data1.dta except that MVIX is calculated over the same calendar month corresponding to each observation.                                                                                                                                                 |
| PASTMSTDRET                                                                                                                                                          | Same as for tds_data1.dta except that PASTMSTDRET is calculated over the calendar month immediately before the month corresponding to each observation.                                                                                                                  |
| POST                                                                                                                                                                 | Same as for tds_data1.dta                                                                                                                                                                                                                                                |
| POSTxdGROUP                                                                                                                                                          | Same as for tds_data1.dta                                                                                                                                                                                                                                                |
| POSTxdHACTIVITY                                                                                                                                                      | Same as for tds_data1.dta                                                                                                                                                                                                                                                |
| POSTxdHDISC                                                                                                                                                          | Same as for tds_data1.dta                                                                                                                                                                                                                                                |
| POSTxdNUMS                                                                                                                                                           | Same as for tds_data1.dta                                                                                                                                                                                                                                                |
| POSTxdTABNUMS                                                                                                                                                        | Same as for tds_data1.dta                                                                                                                                                                                                                                                |
| POSTxdWORDS                                                                                                                                                          | Same as for tds_data1.dta                                                                                                                                                                                                                                                |
| ROA                                                                                                                                                                  | Same as for tds_data1.dta except that ROA corresponds to the most recent fiscal quarter before the calendar month corresponding to each observation.                                                                                                                     |
| SIZE                                                                                                                                                                 | Same as for tds_data1.dta except that SIZE corresponds to the most recent fiscal quarter before the calendar month corresponding to each observation.                                                                                                                    |
| SPREADRISK                                                                                                                                                           | The absolute value of the sum of the coefficients on $DRISK_{d-1}$ , $DRISK_d$ , and $DRISK_{d+1}$ resulting from firm-month regressions of equation (IA.2) in the internet                                                                                              |

|                                                                                                                                                                                                                                    |                                                                                                                                                                                      |
|------------------------------------------------------------------------------------------------------------------------------------------------------------------------------------------------------------------------------------|--------------------------------------------------------------------------------------------------------------------------------------------------------------------------------------|
|                                                                                                                                                                                                                                    | appendix. SPREADRISK captures the association between information asymmetry and movements in a firm's underlying risk factors.                                                       |
| TIME                                                                                                                                                                                                                               | Variable used for time fixed effects, generated as the year-month corresponding to each observation. For example, if the observation comes from December 2008, then TIME = "200812". |
| <b>Variables in tds_data4.dta, dataset used for the time series plots in the internet appendix Figure IA.2. This dataset only contains 12 observations because the plots shows averages for two groups of firms for six years:</b> |                                                                                                                                                                                      |
| <b>Variable</b>                                                                                                                                                                                                                    | <b>Description</b>                                                                                                                                                                   |
| DHFIRM                                                                                                                                                                                                                             | Same as for tds_data1.dta. If a firm has DHFIRM = 1 in the main dataset, then all its observations for the time series plots have DHFIRM = 1.                                        |
| fyear_index                                                                                                                                                                                                                        | Year relative to SFAS 161 adoption. For example, fyear_index = 0 for the year of SFAS 161 adoption, and fyear_index = 1 for the first year after SFAS 161 adoption.                  |
| GROUP_avg                                                                                                                                                                                                                          | The average of the GROUP variable (see Appendix B) across all individual firm-years pertaining to each combination of DHFIRM and fyear_index.                                        |
| NUMS_avg                                                                                                                                                                                                                           | The average of the NUMS variable (see Appendix B) across all individual firm-years pertaining to each combination of DHFIRM and fyear_index.                                         |
| TABNUMS_avg                                                                                                                                                                                                                        | The average of the TABNUMS variable (see Appendix B) across all individual firm-years pertaining to each combination of DHFIRM and fyear_index.                                      |
| WORDS_avg                                                                                                                                                                                                                          | The average of the WORDS variable (see Appendix B) across all individual firm-years pertaining to each combination of DHFIRM and fyear_index.                                        |
