# Supplementary figures and images for: The Information Asymmetry Effects of Expanded Disclosures About Derivative and Hedging Activities
Source: Atypon-hosted journal article supplement (doi:10.1287/mnsc.2021.4198), 2021-12-21

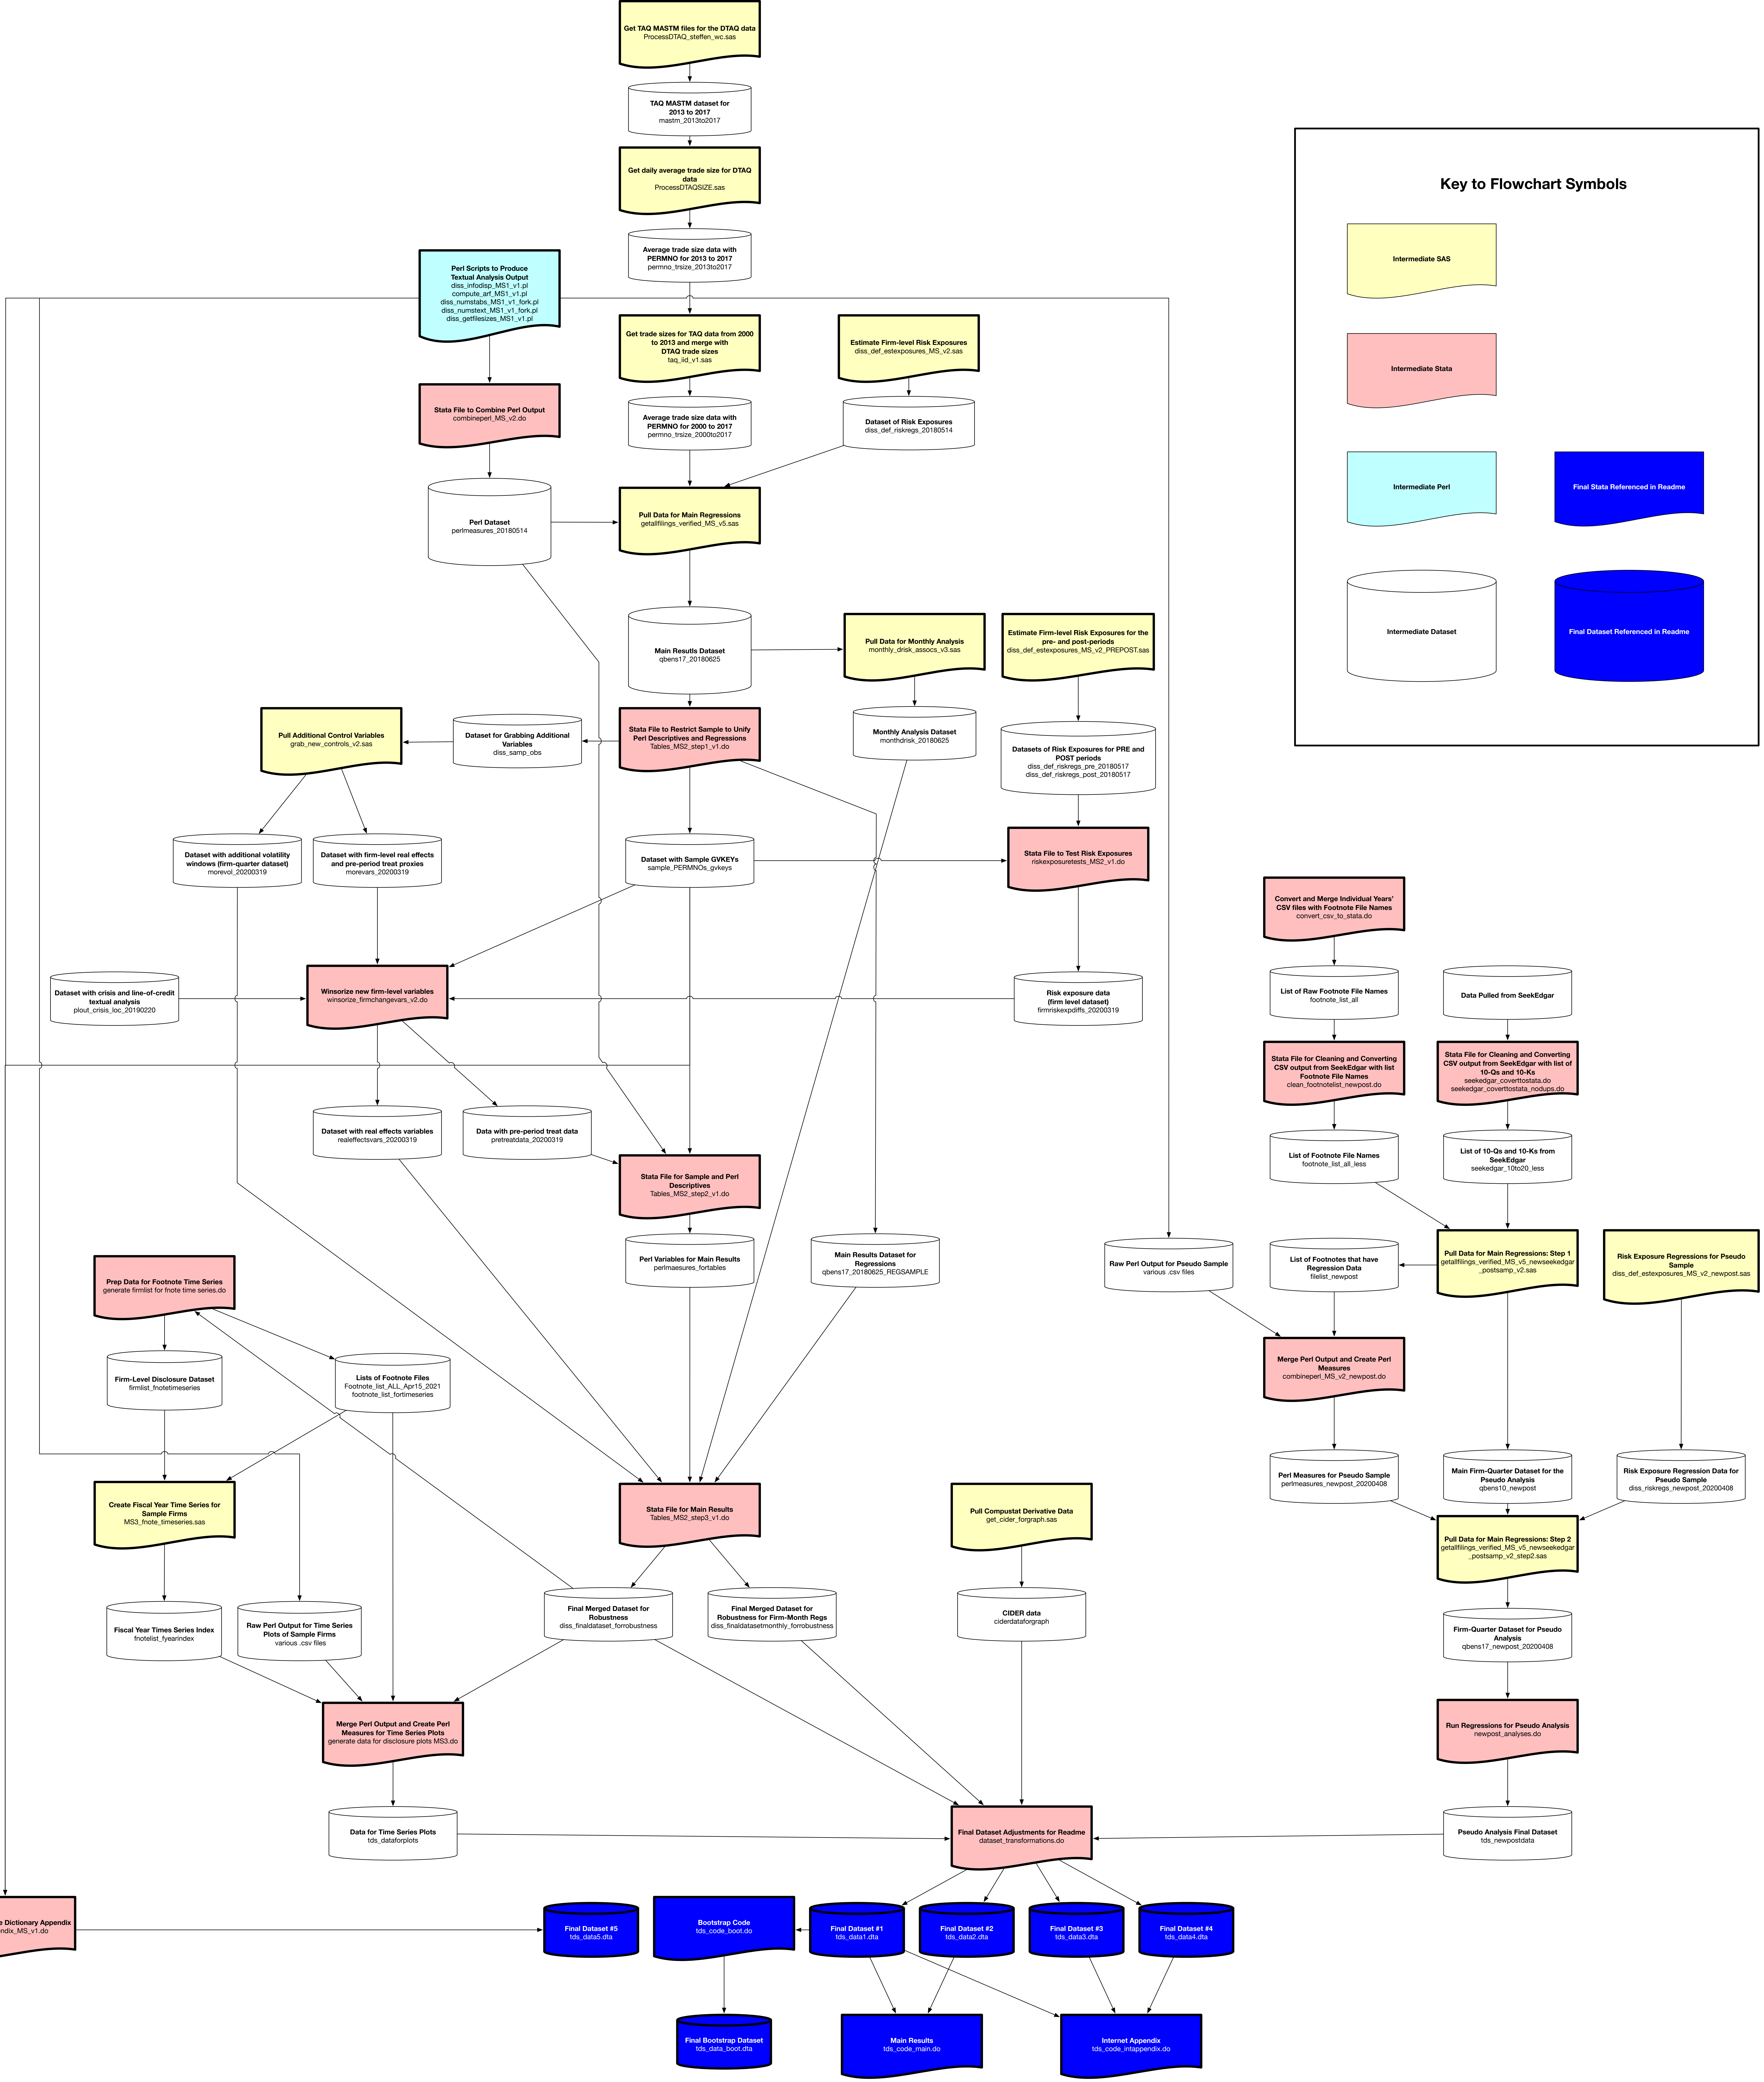

Supplement: mnsc.2021.4198.sm2.zip [file tds_data_flowchart.pdf › Data Files/Files referenced in Readme/tds_data_flowchart.pdf]
